# Supplementary material
Source: MDPI journal article supplement (https://www.mdpi.com/2504-446X/6/11/333)

## Supplementary Material

**Figure S1: Sound Pressure Level (dB) at the different frequencies of 1/3 of an octave (kHz) detected by the species. In grey the spectrum of sound pressure no detected by the species considering the family audiogram.**

### a) species from family Bovidae

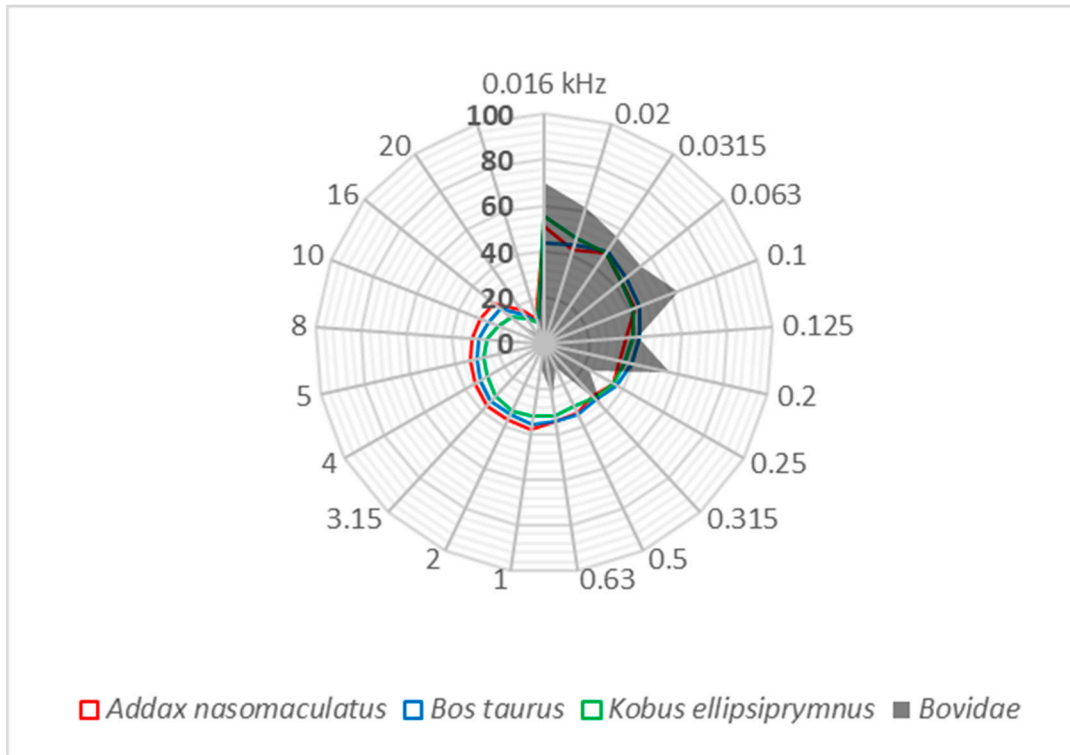

**b) species from family Camelidae**

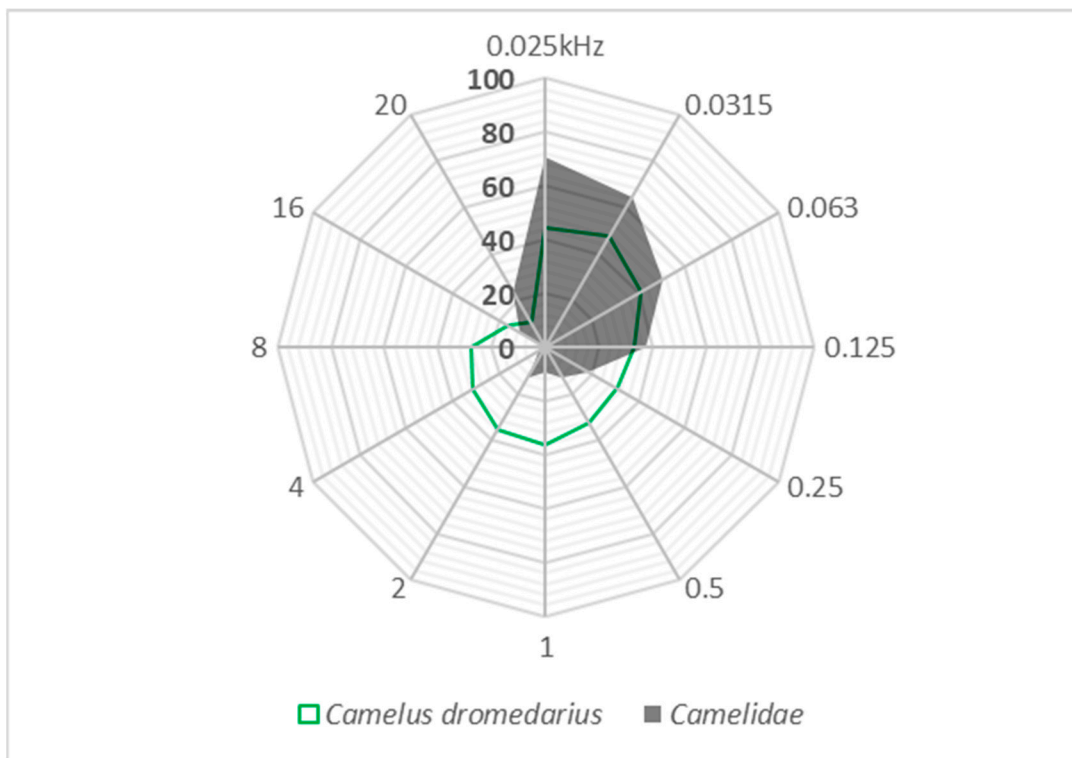

**c) species from family Canidae**

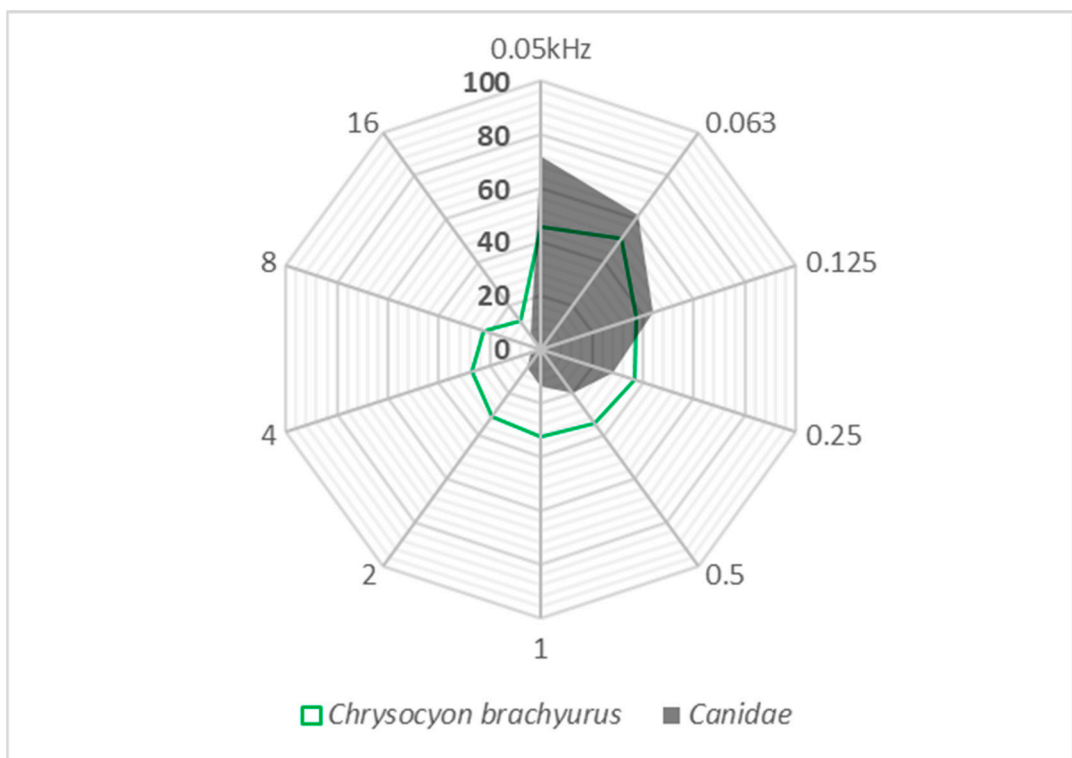

d) species from family Cervidae

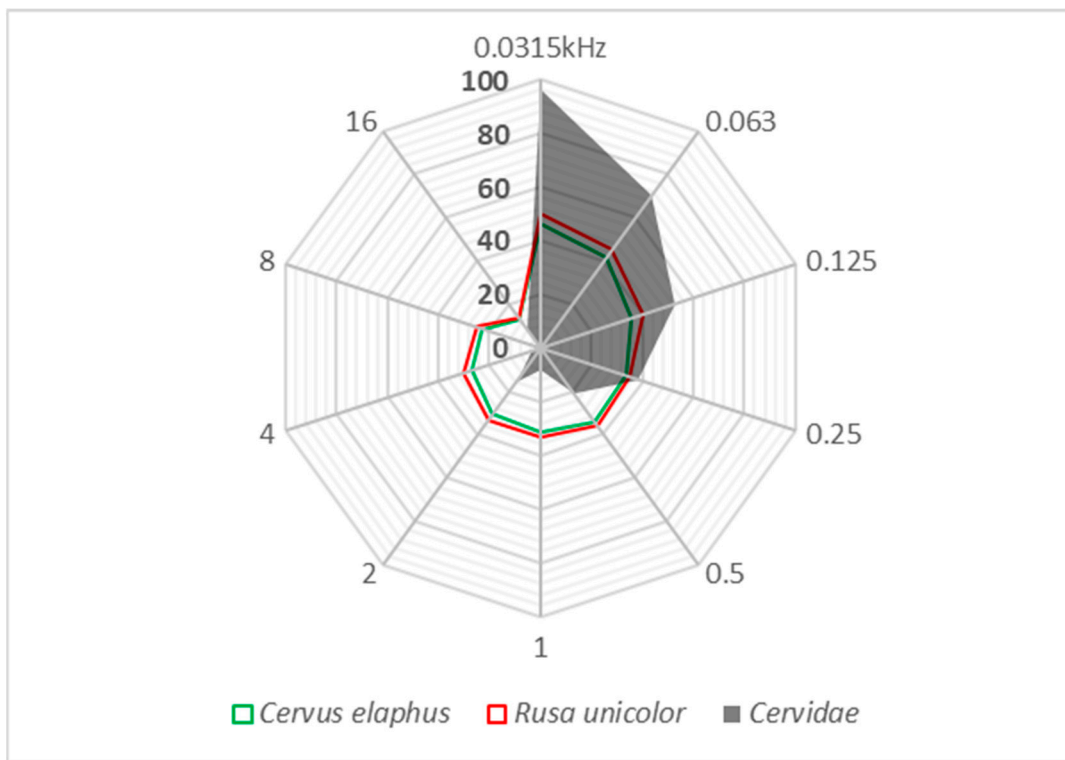

e) species from family Elephantidae

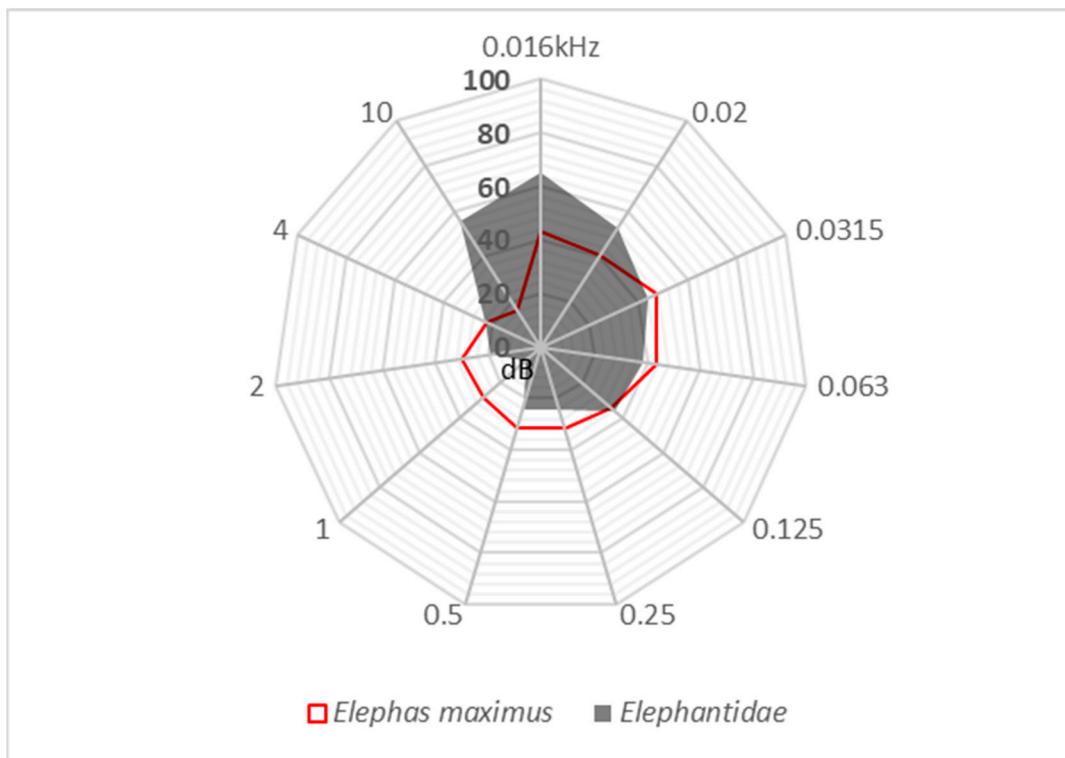

f) species from family Equidae

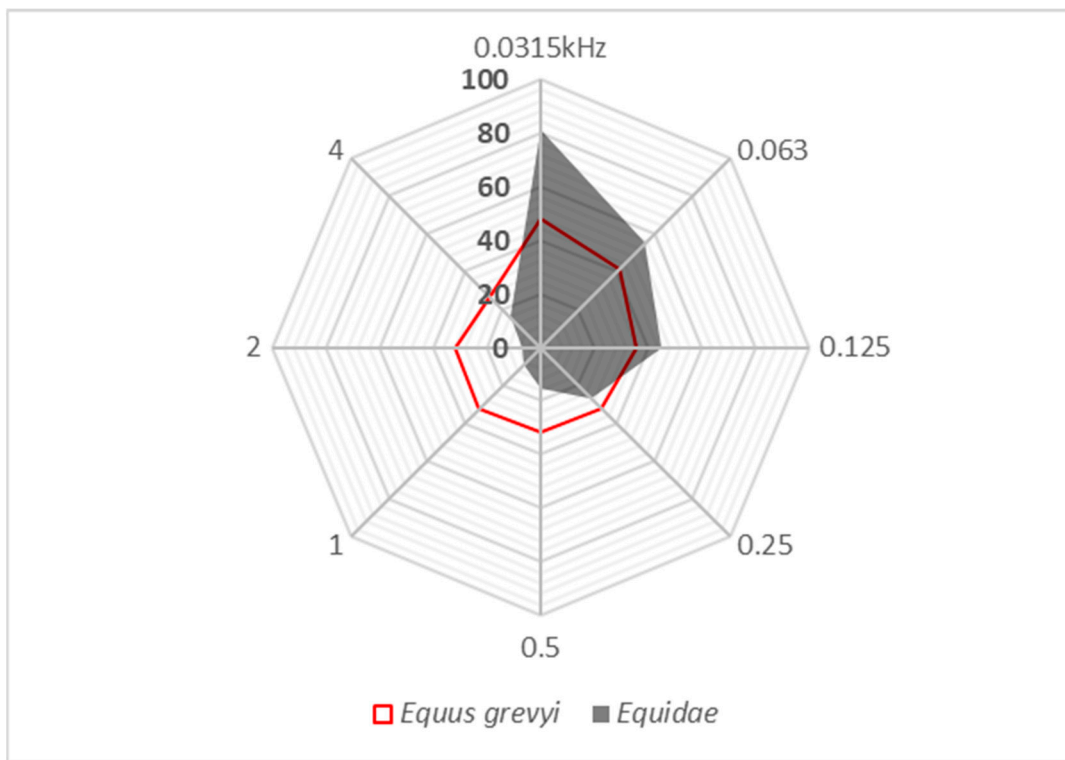

g) species from family Felidae

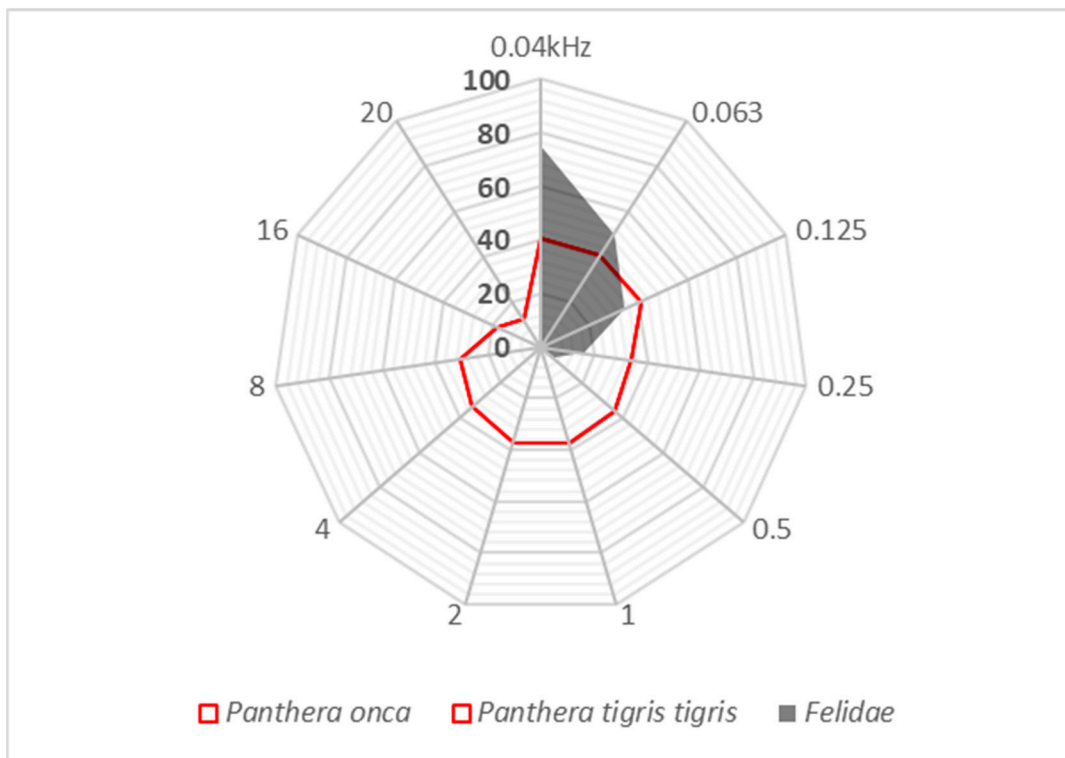

h) species from family Suidae

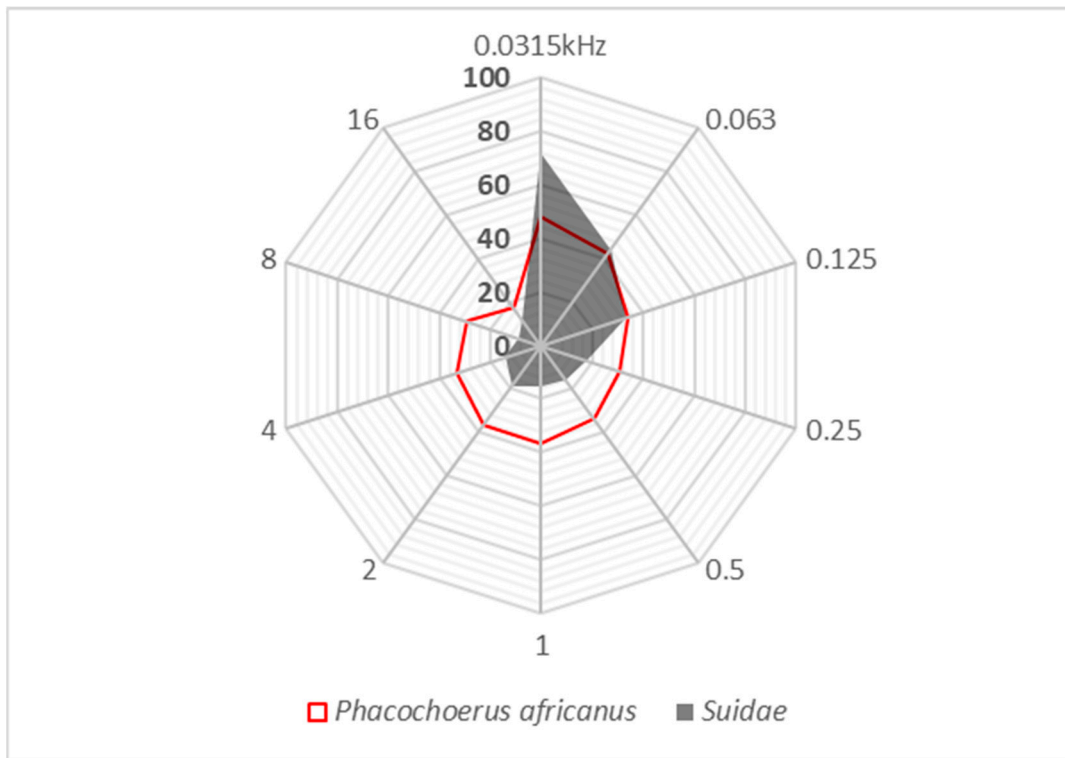

Supplement: s1 [file s1]
